# Supplementary material for: Docosahexaenoic acid, but not eicosapentaenoic acid, improves septic shock-induced arterial dysfunction in rats
Source: PubMed Central journal article supplement (PMC5738044; doi:10.1371/journal.pone.0189658), 2017-12-20
Supplement: pone.0189658.s001.pdf [file pone.0189658.s001.pdf]

Table S1

## Mesenteric resistance arteries: contraction without inhibitor

| RAT             | Phe 10 <sup>-9</sup> | Phe 3.10 <sup>-9</sup> | Phe 10 <sup>-8</sup> | Phe 3.10 <sup>-8</sup> | Phe 10 <sup>-7</sup> |
|-----------------|----------------------|------------------------|----------------------|------------------------|----------------------|
| RAT SHAM G R1   | 0,00                 | 0,00                   | 0,09                 | 0,00                   | 0,08                 |
| R2              | 0,01                 | 0,01                   | -0,04                | 0,06                   | 0,06                 |
| R3              | -0,02                | -0,01                  | 0,00                 | 0,00                   | 0,12                 |
| R4              | -0,06                | -0,06                  | 0,02                 | 0,02                   | -0,04                |
| R5              | -0,03                | 0,00                   | -0,01                | -0,03                  | -0,03                |
| R6              | -0,02                | -0,01                  | -0,04                | 0,00                   | 0,00                 |
| R7              | -0,06                | -0,06                  | 0,00                 | 1,64                   | 3,22                 |
| R8              | 0,06                 | 0,09                   | 0,12                 | 0,06                   | 0,12                 |
| RAT SHAM EI R1  | -0,06                | 0,00                   | -0,05                | -0,03                  | -0,06                |
| R2              | -0,02                | -0,02                  | 0,01                 | -0,04                  | -0,06                |
| R3              | 0,00                 | 0,00                   | -0,04                | -0,02                  | 1,12                 |
| R4              | 0,01                 | 0,02                   | 0,01                 | 0,03                   | 0,09                 |
| R5              | 0,01                 | 0,01                   | 0,01                 | -0,05                  | 0,00                 |
| R6              | 0,00                 | 0,00                   | 0,00                 | 0,01                   | 0,15                 |
| R7              | 0,00                 | 0,00                   | -0,05                | -0,03                  | 0,03                 |
| R8              | 0,03                 | 0,05                   | 0,04                 | -0,02                  | 0,06                 |
| R9              | -0,06                | 0,00                   | 0,00                 | 0,00                   | -0,05                |
| RAT SHAM D R1   | -0,03                | 0,00                   | -0,02                | -0,05                  | 0,01                 |
| R2              | -0,03                | 0,00                   | -0,01                | -0,03                  | -0,01                |
| R3              | 0,05                 | 0,03                   | 0,03                 | 0,03                   | 0,02                 |
| R4              | 0,01                 | 0,02                   | -0,04                | 0,01                   | 0,08                 |
| R5              | 0,05                 | 0,05                   | 0,01                 | 0,06                   | 1,02                 |
| R6              | 0,00                 | 0,19                   | 0,26                 | 0,25                   | 0,29                 |
| R7              | 0,02                 | 0,00                   | -0,03                | 0,06                   | 0,08                 |
| R8              | -0,02                | -0,02                  | 0,06                 | 0,05                   | 0,18                 |
| R9              | 0,04                 | 0,05                   | 0,06                 | 0,06                   | -0,08                |
| RAT SHAM O R1   | -0,08                | -0,08                  | 0,06                 | -0,05                  | 0,09                 |
| R2              | 0,00                 | 0,00                   | -0,04                | -0,02                  | 0,00                 |
| R3              | 0,27                 | 0,27                   | -0,02                | 0,01                   | 0,01                 |
| R4              | 0,02                 | 0,02                   | 0,05                 | -0,05                  | 0,00                 |
| R5              | 0,00                 | 0,00                   | 0,05                 | 0,05                   | 0,07                 |
| R6              | -0,03                | -0,03                  | 0,08                 | 0,08                   | 0,32                 |
| R7              | 0,03                 | 0,03                   | -0,02                | 0,08                   | 0,63                 |
| RAT SEPSIS G R1 | 0,05                 | 0,05                   | 0,08                 | 0,08                   | 0,06                 |
| R2              | 0,02                 | 0,02                   | 0,00                 | 0,00                   | 0,08                 |
| R3              | 0,01                 | 0,01                   | -0,02                | 0,00                   | 0,01                 |
| R4              | 0,02                 | 0,02                   | 0,02                 | 0,00                   | 0,04                 |
| R5              | 0,02                 | 0,02                   | 0,05                 | -0,01                  | -0,01                |
| R6              | 0,00                 | 0,00                   | 0,00                 | -0,06                  | -0,08                |
| RAT SEPSIS E R1 | 0,05                 | 0,05                   | -0,02                | 0,00                   | -0,02                |
| R2              | -0,03                | -0,03                  | -0,03                | 0,00                   | 0,08                 |
| R3              | 0,11                 | 0,11                   | 0,06                 | 0,12                   | 0,05                 |

|              |    |       |       |       |       |       |
|--------------|----|-------|-------|-------|-------|-------|
|              | R4 | 0,03  | 0,09  | 0,09  | 0,18  | 0,21  |
|              | R5 | 0,00  | 0,00  | 0,00  | 0,00  | 0,05  |
|              | R6 | -0,02 | -0,02 | 0,00  | -0,06 | 0,39  |
|              | R7 | -0,11 | -0,11 | -0,21 | -0,09 | -0,09 |
| RAT SEPSIS D | R1 | -0,09 | -0,09 | -0,01 | -0,08 | -0,12 |
|              | R2 | -0,08 | -0,08 | 0,06  | -0,03 | 0,04  |
|              | R3 | -0,03 | -0,03 | 0,01  | -0,02 | 1,19  |
|              | R4 | -0,11 | -0,11 | -0,05 | -0,08 | -0,11 |
|              | R5 | -0,06 | -0,06 | -0,06 | -0,06 | -0,04 |
|              | R6 | 0,15  | 0,15  | 0,22  | 0,17  | 0,05  |
|              | R7 | 0,02  | 0,02  | 0,02  | 0,00  | 0,02  |
| RAT SEPSIS O | R1 | -0,02 | -0,02 | 0,00  | 0,02  | -0,02 |
|              | R2 | -0,01 | -0,01 | -0,03 | -0,04 | -0,06 |
|              | R3 | 0,03  | 0,03  | 0,08  | 0,01  | 0,06  |
|              | R4 | 0,09  | 0,09  | 0,12  | 0,15  | 0,14  |
|              | R5 | -0,11 | -0,11 | -0,01 | -0,08 | 0,04  |
|              | R6 | -0,06 | -0,01 | 0,00  | 0,00  | 0,21  |
|              | R7 | -0,11 | -0,11 | -0,12 | -0,12 | -0,14 |

| Phe 3.10 <sup>-7</sup> | Phe 10 <sup>-6</sup> | Phe 3.10 <sup>-6</sup> | Phe 10 <sup>-5</sup> | Phe 3.10 <sup>-5</sup> |
|------------------------|----------------------|------------------------|----------------------|------------------------|
| 1,41                   | 7,96                 | 10,54                  | 11,14                | 11,15                  |
| 0,99                   | 12,13                | 13,44                  | 13,24                | 13,25                  |
| 0,25                   | 1,29                 | 6,17                   | 6,60                 | 8,60                   |
| 0,14                   | 4,91                 | 7,75                   | 7,94                 | 9,89                   |
| 4,78                   | 6,45                 | 6,65                   | 6,81                 | 8,75                   |
| 0,17                   | 0,66                 | 6,36                   | 8,25                 | 8,25                   |
| 5,26                   | 9,94                 | 11,01                  | 11,43                | 11,44                  |
| 1,74                   | 3,83                 | 9,76                   | 10,68                | 10,67                  |
| 1,46                   | 1,91                 | 7,37                   | 9,45                 | 9,46                   |
| 0,55                   | 15,61                | 18,12                  | 18,10                | 18,10                  |
| 4,35                   | 7,38                 | 9,97                   | 8,45                 | 8,45                   |
| 0,08                   | 1,94                 | 3,20                   | 3,25                 | 3,23                   |
| 0,05                   | 2,14                 | 3,63                   | 5,39                 | 8,39                   |
| 0,61                   | 5,04                 | 6,60                   | 8,64                 | 8,65                   |
| 0,03                   | 4,18                 | 5,59                   | 5,90                 | 8,90                   |
| 0,35                   | 2,72                 | 4,87                   | 6,46                 | 6,46                   |
| 0,39                   | 5,64                 | 11,04                  | 10,21                | 10,20                  |
| 0,64                   | 5,28                 | 7,71                   | 7,51                 | 7,51                   |
| 0,08                   | 4,96                 | 7,55                   | 8,12                 | 8,13                   |
| 0,08                   | 6,29                 | 9,16                   | 8,38                 | 8,38                   |
| 4,42                   | 8,33                 | 8,99                   | 9,26                 | 9,26                   |
| 2,26                   | 10,74                | 11,47                  | 11,10                | 11,11                  |
| 0,63                   | 11,95                | 12,84                  | 13,07                | 13,07                  |
| 5,16                   | 10,57                | 11,74                  | 11,81                | 11,81                  |
| 2,04                   | 12,85                | 13,01                  | 13,11                | 13,10                  |
| 0,04                   | 5,11                 | 9,07                   | 9,93                 | 9,93                   |
| 6,22                   | 11,84                | 13,78                  | 13,34                | 13,34                  |
| 0,11                   | 5,69                 | 9,49                   | 9,62                 | 9,61                   |
| 5,59                   | 9,97                 | 12,38                  | 12,35                | 12,35                  |
| 0,03                   | 5,04                 | 9,77                   | 10,18                | 10,18                  |
| 0,10                   | 5,49                 | 8,98                   | 11,90                | 11,88                  |
| 0,33                   | 8,01                 | 8,51                   | 9,12                 | 9,13                   |
| 7,31                   | 13,51                | 13,97                  | 13,60                | 13,60                  |
| 0,03                   | 0,61                 | 4,44                   | 6,59                 | 6,59                   |
| 1,41                   | 5,39                 | 3,63                   | 5,71                 | 5,72                   |
| 0,01                   | 0,16                 | 1,32                   | 1,98                 | 1,97                   |
| 0,02                   | 0,88                 | 1,05                   | 1,43                 | 1,44                   |
| 0,43                   | 0,94                 | 1,67                   | 3,72                 | 3,72                   |
| -0,03                  | 4,56                 | 5,33                   | 6,64                 | 6,64                   |
| 0,08                   | 0,05                 | 2,37                   | 5,57                 | 5,57                   |
| 0,14                   | 0,39                 | 4,32                   | 6,82                 | 6,82                   |
| 0,03                   | 1,45                 | 5,25                   | 4,98                 | 4,94                   |

|       |      |       |       |       |
|-------|------|-------|-------|-------|
| 0,21  | 1,85 | 2,13  | 4,15  | 4,11  |
| 0,09  | 0,11 | 2,21  | 5,88  | 5,88  |
| 1,53  | 6,17 | 5,28  | 6,80  | 6,81  |
| -0,12 | 4,28 | 6,61  | 6,65  | 6,64  |
| 0,02  | 8,12 | 10,05 | 9,91  | 9,90  |
| 0,12  | 2,53 | 3,18  | 5,55  | 7,54  |
| 0,09  | 3,76 | 5,99  | 6,09  | 6,10  |
| -0,12 | 0,68 | 3,57  | 4,61  | 6,61  |
| 0,00  | 3,92 | 7,74  | 7,97  | 8,96  |
| 0,00  | 4,76 | 10,94 | 11,03 | 11,09 |
| 0,00  | 0,06 | 2,25  | 9,44  | 9,45  |
| 0,15  | 7,37 | 10,01 | 10,29 | 10,29 |
| -0,06 | 1,43 | 5,52  | 7,44  | 7,43  |
| 0,24  | 6,43 | 8,61  | 8,62  | 8,60  |
| 0,09  | 4,99 | 7,99  | 8,75  | 8,75  |
| 8,52  | 4,63 | 11,40 | 10,11 | 10,11 |
| 0,33  | 3,34 | 9,10  | 10,12 | 10,14 |
| 0,78  | 1,15 | 6,39  | 12,49 | 12,51 |
