# Supplementary material for: Docosahexaenoic acid, but not eicosapentaenoic acid, improves septic shock-induced arterial dysfunction in rats
Source: PubMed Central journal article supplement (PMC5738044; doi:10.1371/journal.pone.0189658), 2017-12-20
Supplement: pone.0189658.s002.pdf [file pone.0189658.s002.pdf]

Table S2

**Mesenteric resistance arteries: contraction under L-NA**

| RAT             | Phe 10 <sup>-9</sup> | Phe 3.10 <sup>-9</sup> | Phe 10 <sup>-8</sup> | Phe 3.10 <sup>-8</sup> | Phe 10 <sup>-7</sup> |
|-----------------|----------------------|------------------------|----------------------|------------------------|----------------------|
| RAT SHAM G R1   | 0,00                 | -0,01                  | 0,02                 | 0,00                   | 0,02                 |
| R2              | 0,02                 | -0,02                  | 0,00                 | -0,06                  | 0,02                 |
| R3              | 0,01                 | 0,01                   | 0,08                 | 0,06                   | 0,09                 |
| R4              | 0,00                 | 0,00                   | 0,08                 | 0,02                   | 0,04                 |
| R5              | 0,00                 | 0,03                   | 0,03                 | 0,04                   | 0,01                 |
| R6              | 0,00                 | 0,00                   | 0,00                 | -0,01                  | -0,03                |
| R7              | -0,05                | 0,02                   | -0,06                | 0,00                   | 0,05                 |
| R8              | 0,15                 | 0,06                   | -0,15                | -0,20                  | -0,06                |
| RAT SHAM EI R1  | 0,08                 | 0,08                   | 0,09                 | 0,06                   | 0,11                 |
| R2              | 0,02                 | 0,08                   | 0,00                 | 0,00                   | 0,00                 |
| R3              | 0,09                 | 0,06                   | 0,11                 | 0,11                   | 0,11                 |
| R4              | 0,04                 | 0,04                   | 0,06                 | 0,05                   | -0,01                |
| R5              | -0,12                | 0,05                   | 0,02                 | 0,15                   | -0,06                |
| R6              | 0,06                 | 0,06                   | 0,08                 | 0,05                   | 0,08                 |
| R7              | 0,09                 | 0,11                   | 0,11                 | 0,11                   | 0,15                 |
| R8              | -0,04                | 0,05                   | -0,03                | 0,00                   | -0,01                |
| R9              | -0,35                | -0,35                  | -0,26                | -0,31                  | -0,25                |
| RAT SHAM D R1   | -0,06                | -0,06                  | -0,03                | -0,06                  | -0,06                |
| R2              | 0,08                 | 0,02                   | 0,06                 | 0,11                   | 0,05                 |
| R3              | 0,08                 | 0,08                   | 0,06                 | 0,04                   | 0,04                 |
| R4              | -0,01                | 0,02                   | -0,05                | 0,00                   | -0,12                |
| R5              | 0,94                 | -0,11                  | 0,01                 | -0,01                  | -0,03                |
| R6              | -0,06                | -0,06                  | -0,08                | -0,06                  | -0,06                |
| R7              | -0,01                | -0,01                  | -0,03                | -0,06                  | 0,02                 |
| R8              | 0,00                 | 0,08                   | 0,05                 | 0,06                   | 0,02                 |
| R9              | 0,12                 | 0,22                   | 0,20                 | 0,20                   | 0,17                 |
| RAT SHAM O R1   | 0,08                 | 0,06                   | 0,08                 | 0,09                   | 0,18                 |
| R2              | 0,02                 | 0,00                   | -0,08                | -0,09                  | -0,08                |
| R3              | 0,02                 | 0,02                   | 0,02                 | 0,02                   | 0,02                 |
| R4              | -0,22                | 0,12                   | 0,21                 | -0,02                  | -0,05                |
| R5              | 0,00                 | 0,00                   | 0,00                 | -0,05                  | -0,06                |
| R6              | -0,02                | -0,09                  | -0,32                | -0,46                  | -0,43                |
| R7              | 0,05                 | 0,03                   | 0,06                 | 0,08                   | 0,06                 |
| R8              | 0,04                 | 0,00                   | -0,03                | 0,04                   | 0,02                 |
| RAT SEPSIS G R1 | 0,01                 | 0,05                   | 0,05                 | 0,06                   | 0,16                 |
| R2              | 0,06                 | 0,05                   | 0,06                 | 0,09                   | 0,05                 |
| R3              | 0,00                 | 0,01                   | -0,02                | -0,02                  | 0,08                 |
| R4              | -0,03                | -0,08                  | 0,00                 | -0,09                  | -0,11                |
| R5              | 0,06                 | -0,02                  | 0,08                 | -0,02                  | 0,06                 |
| R6              | 0,00                 | 0,06                   | 0,08                 | 0,08                   | -0,01                |
| RAT SEPSIS E R1 | 0,01                 | 0,05                   | 0,05                 | 0,06                   | 0,16                 |

|  |                |       |       |       |       |       |
|--|----------------|-------|-------|-------|-------|-------|
|  | R2             | 0,06  | 0,05  | 0,06  | 0,09  | 0,05  |
|  | R3             | 0,00  | 0,01  | -0,02 | -0,02 | 0,08  |
|  | R4             | -0,03 | -0,08 | 0,00  | -0,09 | -0,11 |
|  | R5             | 0,06  | -0,02 | 0,08  | -0,02 | 0,06  |
|  | RAT SEPSIS DR1 | 0,00  | 0,01  | 0,00  | 0,00  | -0,02 |
|  | R2             | 0,00  | -0,01 | 0,02  | 0,00  | 0,02  |
|  | R3             | 0,08  | 0,06  | 0,05  | 0,14  | 0,06  |
|  | R4             | 0,19  | 0,19  | 0,06  | 0,19  | 0,20  |
|  | R5             | 0,02  | 0,00  | 0,00  | -0,02 | 0,02  |
|  | R6             | 0,00  | 0,02  | -0,08 | -0,01 | 0,12  |
|  | RAT SEPSIS OR1 | 0,05  | 0,06  | 0,11  | 0,08  | 0,09  |
|  | R2             | 0,00  | 0,06  | 0,03  | 0,06  | 0,00  |
|  | R3             | 0,00  | -0,01 | 0,00  | 0,02  | 0,05  |
|  | R4             | -0,01 | -0,08 | -0,14 | -0,11 | -0,06 |
|  | R5             | -0,02 | -0,05 | -0,15 | -0,21 | -0,05 |
|  | R6             | 0,17  | 0,22  | 0,09  | 0,06  | 0,03  |

| <b>Phe 3.10<sup>-7</sup></b> | <b>Phe 10<sup>-6</sup></b> | <b>Phe 3.10<sup>-6</sup></b> | <b>Phe 10<sup>-5</sup></b> | <b>Phe 3.10<sup>-5</sup></b> |
|------------------------------|----------------------------|------------------------------|----------------------------|------------------------------|
| 0,05                         | 0,08                       | 2,18                         | 7,02                       | 8,04                         |
| 0,00                         | 0,60                       | 7,29                         | 14,96                      | 15,39                        |
| -0,05                        | 0,14                       | 4,35                         | 8,64                       | 9,05                         |
| 0,04                         | 0,08                       | 2,24                         | 5,38                       | 5,21                         |
| 0,06                         | 1,22                       | 7,51                         | 11,61                      | 11,75                        |
| -0,03                        | 0,28                       | 6,08                         | 8,06                       | 8,49                         |
| 0,00                         | 0,06                       | 3,36                         | 7,72                       | 12,24                        |
| -0,17                        | 0,25                       | 8,82                         | 13,34                      | 12,35                        |
| 0,09                         | 2,58                       | 4,52                         | 6,73                       | 7,05                         |
| 0,03                         | 2,31                       | 12,42                        | 14,48                      | 14,51                        |
| 0,23                         | 5,34                       | 7,12                         | 9,06                       | 9,65                         |
| 0,04                         | 0,06                       | 5,29                         | 7,04                       | 7,28                         |
| -0,03                        | 0,37                       | 5,52                         | 8,06                       | 7,12                         |
| 0,06                         | 0,23                       | 2,49                         | 5,78                       | 7,66                         |
| 0,09                         | 0,15                       | 3,91                         | 7,71                       | 9,08                         |
| 0,16                         | 0,08                       | 3,14                         | 4,37                       | 8,44                         |
| 0,00                         | -0,09                      | 0,06                         | 2,08                       | 3,95                         |
| -0,08                        | 0,00                       | 0,86                         | 1,72                       | 2,61                         |
| 0,08                         | 0,09                       | 2,53                         | 6,33                       | 6,88                         |
| 0,06                         | 0,82                       | 9,89                         | 13,12                      | 12,22                        |
| 0,05                         | 3,12                       | 6,79                         | 7,76                       | 8,03                         |
| 0,09                         | 0,51                       | 11,74                        | 13,60                      | 13,92                        |
| -0,06                        | 0,01                       | 0,76                         | 6,95                       | 9,19                         |
| -0,01                        | 2,66                       | 6,10                         | 11,35                      | 11,66                        |
| 0,06                         | 0,09                       | 10,14                        | 14,15                      | 14,95                        |
| 0,17                         | 0,36                       | 0,74                         | 4,18                       | 5,47                         |
| 0,06                         | 1,35                       | 7,20                         | 9,04                       | 10,12                        |
| 0,06                         | 0,98                       | 8,96                         | 12,32                      | 13,60                        |
| 0,02                         | 0,23                       | 4,92                         | 13,51                      | 13,82                        |
| 0,11                         | 1,16                       | 0,86                         | 7,25                       | 7,95                         |
| 0,03                         | 0,06                       | 5,99                         | 7,69                       | 7,71                         |
| -0,32                        | 1,39                       | 8,22                         | 8,79                       | 7,84                         |
| 0,03                         | 2,06                       | 4,30                         | 7,62                       | 7,09                         |
| 0,05                         | 0,12                       | 2,44                         | 7,14                       | 7,94                         |
| 0,58                         | 0,39                       | 4,50                         | 7,96                       | 8,34                         |
| 0,03                         | 0,11                       | 7,12                         | 8,46                       | 8,26                         |
| 0,06                         | 0,08                       | 2,68                         | 4,68                       | 5,76                         |
| 0,03                         | 0,03                       | 0,39                         | 2,11                       | 4,27                         |
| 0,04                         | 0,01                       | 0,14                         | 5,76                       | 6,19                         |
| 0,08                         | 0,09                       | 2,64                         | 3,48                       | 6,04                         |
| 0,58                         | 0,39                       | 4,50                         | 7,96                       | 9,54                         |

|       |       |      |       |       |
|-------|-------|------|-------|-------|
| 0,03  | 0,11  | 7,12 | 8,46  | 8,26  |
| 0,06  | 0,08  | 2,68 | 4,68  | 4,76  |
| 0,03  | 0,03  | 0,39 | 2,11  | 5,27  |
| 0,04  | 0,01  | 0,14 | 5,76  | 6,19  |
| 0,03  | 0,05  | 2,99 | 4,75  | 4,79  |
| -0,08 | 0,00  | 1,99 | 4,03  | 4,71  |
| 0,11  | 0,12  | 2,91 | 4,54  | 6,17  |
| 0,11  | 0,43  | 3,78 | 9,96  | 10,72 |
| -0,05 | 0,08  | 0,92 | 7,75  | 8,93  |
| 0,14  | 0,05  | 1,42 | 8,96  | 12,01 |
| 0,05  | 0,20  | 4,03 | 10,48 | 10,69 |
| -0,02 | 0,12  | 2,39 | 5,76  | 6,11  |
| 0,05  | 0,14  | 5,96 | 8,24  | 9,21  |
| 0,17  | -0,09 | 2,93 | 3,54  | 6,46  |
| 0,00  | 7,26  | 9,45 | 11,26 | 10,89 |
| 0,09  | 0,15  | 4,78 | 6,74  | 8,58  |
