# Supplementary material for: Docosahexaenoic acid, but not eicosapentaenoic acid, improves septic shock-induced arterial dysfunction in rats
Source: PubMed Central journal article supplement (PMC5738044; doi:10.1371/journal.pone.0189658), 2017-12-20
Supplement: pone.0189658.s003.pdf [file pone.0189658.s003.pdf]

Table S3

**Mesenteric resistance arteries: contraction under Indomethacin**

| RAT             | Phe 10 <sup>-9</sup> | Phe 3.10 <sup>-9</sup> | Phe 10 <sup>-8</sup> | Phe 3.10 <sup>-8</sup> | Phe 10 <sup>-7</sup> |
|-----------------|----------------------|------------------------|----------------------|------------------------|----------------------|
| RAT SHAM G R1   | 0,01                 | -0,05                  | -0,05                | 0,00                   | -0,02                |
| R2              | 0,15                 | 0,16                   | 0,20                 | 0,35                   | 0,52                 |
| R3              | 0,03                 | 0,06                   | 0,08                 | 0,09                   | 0,09                 |
| R4              | 0,01                 | -0,31                  | -0,14                | -0,08                  | -0,09                |
| R5              | -0,02                | 0,08                   | 0,03                 | 0,06                   | 0,19                 |
| R6              | -0,01                | 0,06                   | 0,14                 | -0,14                  | -0,01                |
| R7              | -0,02                | -0,03                  | -0,03                | -0,03                  | 0,18                 |
| R8              | 0,00                 | 0,00                   | 0,00                 | 0,05                   | 0,08                 |
| R9              | 0,03                 | -0,02                  | 0,02                 | 0,05                   | 0,03                 |
| R10             | -0,03                | -0,03                  | -0,03                | 0,11                   | 0,02                 |
| RAT SHAM EI R1  | 0,00                 | 0,02                   | 0,02                 | 0,00                   | 0,00                 |
| R2              | 0,02                 | -0,05                  | -0,09                | -0,06                  | -0,03                |
| R3              | 0,00                 | 0,00                   | 0,00                 | -0,01                  | -0,01                |
| R4              | 0,06                 | 0,11                   | 0,03                 | 0,11                   | 0,50                 |
| R5              | -0,06                | 0,32                   | 0,12                 | 0,29                   | 0,18                 |
| R6              | 0,04                 | -0,06                  | 0,04                 | 0,12                   | 0,40                 |
| R7              | -0,28                | -0,25                  | -0,17                | -0,53                  | -0,12                |
| R8              | -0,13                | -0,18                  | -0,01                | -0,05                  | -0,02                |
| R9              | -0,02                | 0,04                   | -0,09                | 0,03                   | -0,22                |
| R10             | 0,05                 | 0,05                   | 0,02                 | 0,00                   | 0,06                 |
| RAT SHAM D R1   | -0,06                | -0,15                  | -0,28                | -0,18                  | 0,04                 |
| R2              | 0,00                 | 0,00                   | 0,08                 | 0,15                   | 0,54                 |
| R3              | 0,00                 | -0,01                  | -0,03                | -0,11                  | -0,06                |
| R4              | -0,03                | 0,00                   | 0,02                 | -0,09                  | -0,05                |
| R5              | 0,09                 | 0,03                   | 0,12                 | 0,09                   | 0,21                 |
| R6              | 0,06                 | 0,06                   | 0,14                 | 0,35                   | 1,26                 |
| R7              | 0,03                 | 0,03                   | 0,06                 | 0,14                   | 0,61                 |
| R8              | -0,02                | -0,03                  | 0,09                 | 0,06                   | 0,34                 |
| R9              | 0,02                 | -0,03                  | 0,08                 | 0,18                   | 0,35                 |
| RAT SHAM O R1   | -0,15                | -0,02                  | -0,03                | -0,08                  | 0,00                 |
| R2              | -0,03                | -0,03                  | -0,08                | -0,03                  | -0,02                |
| R3              | 0,00                 | -0,02                  | 0,00                 | 0,06                   | 0,67                 |
| R4              | 0,02                 | 0,06                   | 0,03                 | 0,05                   | 0,06                 |
| R5              | 0,06                 | 0,06                   | 0,07                 | 0,06                   | 0,08                 |
| R6              | 0,34                 | 0,34                   | 0,09                 | 0,26                   | 0,41                 |
| R7              | -0,08                | 0,06                   | 0,11                 | -0,01                  | -0,04                |
| R8              | 0,26                 | 0,18                   | 0,38                 | 0,34                   | 0,63                 |
| RAT SEPSIS G R1 | -0,11                | -0,14                  | 0,00                 | -0,02                  | -0,03                |
| R2              | -0,14                | -0,23                  | -0,45                | -0,22                  | -0,23                |
| R3              | 0,18                 | 0,14                   | 0,14                 | 0,15                   | 0,03                 |
| R4              | 0,06                 | 0,05                   | 0,12                 | 0,02                   | 0,05                 |

|              |    |       |       |       |       |       |
|--------------|----|-------|-------|-------|-------|-------|
|              | R5 | 0,09  | 0,06  | 0,08  | 0,06  | 0,08  |
|              | R6 | -0,11 | 0,00  | -0,06 | 0,04  | 0,03  |
|              | R7 | 0,00  | 0,02  | -0,04 | -0,01 | -0,04 |
|              | R8 | -0,01 | -0,01 | 0,05  | -0,01 | -0,01 |
| RAT SEPSIS E | R1 | 0,03  | 0,03  | 0,02  | 0,03  | 0,00  |
|              | R2 | 0,00  | 0,00  | 0,08  | 0,00  | 0,02  |
|              | R3 | 0,00  | -0,02 | 0,00  | 0,03  | 0,08  |
|              | R4 | 0,14  | 0,14  | 0,08  | 0,06  | 0,12  |
|              | R5 | 0,05  | 0,05  | 0,06  | 0,06  | 0,06  |
|              | R6 | 0,03  | 0,03  | -0,05 | -0,14 | 0,09  |
|              | R7 | 0,00  | 0,05  | 0,08  | 0,24  | 0,03  |
|              | R8 | 0,01  | 0,04  | 0,01  | -0,05 | 0,00  |
|              | R9 | 0,00  | 0,01  | 0,01  | -0,05 | 0,00  |
| RAT SEPSIS D | R1 | 0,03  | 0,02  | 0,00  | -0,02 | -0,02 |
|              | R2 | -0,05 | -0,09 | -0,12 | -0,11 | 0,55  |
|              | R3 | 0,00  | -0,02 | 0,00  | -0,03 | 0,05  |
|              | R4 | -0,36 | -0,09 | -0,12 | -0,12 | -0,09 |
|              | R5 | 0,02  | 0,02  | 0,00  | 0,02  | 0,04  |
|              | R6 | 0,11  | 0,06  | 0,14  | 0,16  | 0,25  |
|              | R7 | -0,02 | 0,00  | -0,02 | -0,02 | -0,02 |
|              | R8 | -0,06 | -0,01 | 0,16  | -0,01 | 0,09  |
| RAT SEPSIS O | R1 | 0,00  | 0,00  | -0,03 | -0,02 | -0,03 |
|              | R2 | 0,08  | -0,02 | 0,06  | 0,02  | 0,05  |
|              | R3 | 0,08  | 0,06  | 0,05  | 0,05  | 0,06  |
|              | R4 | 0,00  | 0,00  | 0,01  | 0,00  | -0,02 |
|              | R5 | -0,01 | 0,03  | 0,00  | 0,00  | -0,01 |
|              | R6 | 0,00  | 0,00  | 0,00  | 0,05  | 0,06  |
|              | R7 | -0,02 | -0,02 | 0,03  | 0,03  | 0,04  |
|              | R8 | -0,05 | 0,03  | -0,06 | 0,01  | 0,06  |

| <b>Phe 3.10<sup>-7</sup></b> | <b>Phe 10<sup>-6</sup></b> | <b>Phe 3.10<sup>-6</sup></b> | <b>Phe 10<sup>-5</sup></b> | <b>Phe 3.10<sup>-5</sup></b> |
|------------------------------|----------------------------|------------------------------|----------------------------|------------------------------|
| 0,43                         | 5,30                       | 10,35                        | 11,51                      | 11,56                        |
| 1,73                         | 12,74                      | 14,12                        | 15,98                      | 15,59                        |
| 9,45                         | 12,29                      | 12,69                        | 12,54                      | 12,50                        |
| 0,72                         | 6,06                       | 9,85                         | 10,88                      | 10,72                        |
| 2,29                         | 11,34                      | 12,69                        | 12,20                      | 12,11                        |
| 0,56                         | 8,34                       | 12,21                        | 12,01                      | 12,16                        |
| 1,65                         | 8,36                       | 10,31                        | 10,76                      | 11,01                        |
| 1,06                         | 7,14                       | 12,21                        | 12,16                      | 12,52                        |
| 0,11                         | 2,57                       | 6,91                         | 7,48                       | 7,63                         |
| 0,28                         | 3,08                       | 7,31                         | 8,27                       | 8,21                         |
| 0,06                         | 0,48                       | 12,68                        | 12,85                      | 12,26                        |
| -0,03                        | 0,28                       | 13,21                        | 13,38                      | 13,38                        |
| 5,42                         | 7,95                       | 10,79                        | 11,89                      | 12,23                        |
| 2,37                         | 6,62                       | 7,06                         | 7,36                       | 7,49                         |
| 1,36                         | 2,46                       | 11,06                        | 12,01                      | 12,35                        |
| 2,59                         | 6,68                       | 8,26                         | 10,44                      | 10,32                        |
| 0,55                         | 2,04                       | 6,46                         | 9,71                       | 9,88                         |
| 0,45                         | 3,09                       | 6,07                         | 9,24                       | 9,51                         |
| 0,98                         | 4,87                       | 9,32                         | 10,20                      | 10,55                        |
| 0,55                         | 5,96                       | 10,16                        | 10,01                      | 10,74                        |
| 0,23                         | 3,46                       | 12,03                        | 13,79                      | 12,73                        |
| 3,89                         | 7,02                       | 7,74                         | 8,04                       | 8,26                         |
| 1,12                         | 3,16                       | 11,51                        | 11,51                      | 11,89                        |
| -0,06                        | 7,26                       | 11,05                        | 11,72                      | 12,26                        |
| 3,06                         | 8,21                       | 10,86                        | 11,42                      | 11,59                        |
| 4,67                         | 10,31                      | 12,47                        | 12,41                      | 12,41                        |
| 1,90                         | 9,38                       | 12,02                        | 12,96                      | 12,80                        |
| 1,02                         | 12,35                      | 12,72                        | 12,05                      | 12,71                        |
| 2,42                         | 7,23                       | 11,66                        | 11,78                      | 11,81                        |
| 0,71                         | 11,23                      | 11,74                        | 12,73                      | 12,52                        |
| 0,18                         | 8,55                       | 12,52                        | 13,59                      | 13,45                        |
| 1,81                         | 6,98                       | 9,04                         | 9,62                       | 9,44                         |
| 0,09                         | 2,79                       | 6,49                         | 10,86                      | 10,83                        |
| 0,45                         | 5,62                       | 12,04                        | 12,93                      | 13,35                        |
| 1,68                         | 5,79                       | 8,16                         | 9,93                       | 9,98                         |
| 2,76                         | 3,48                       | 7,56                         | 8,76                       | 8,88                         |
| 2,15                         | 5,86                       | 10,34                        | 11,69                      | 11,91                        |
| 0,14                         | 0,35                       | 5,21                         | 7,00                       | 7,54                         |
| 4,34                         | 5,61                       | 9,41                         | 9,77                       | 9,82                         |
| -0,01                        | 0,17                       | 2,93                         | 8,89                       | 8,91                         |
| 3,34                         | 5,34                       | 6,21                         | 7,31                       | 7,75                         |

|       |       |       |       |       |
|-------|-------|-------|-------|-------|
| 0,08  | 2,31  | 4,56  | 7,71  | 7,50  |
| 0,11  | 2,37  | 9,18  | 9,42  | 9,46  |
| 0,12  | 5,34  | 8,41  | 9,41  | 9,28  |
| 0,48  | 3,92  | 10,32 | 11,11 | 9,65  |
| 0,02  | 0,03  | 1,24  | 7,40  | 7,80  |
| 0,15  | 3,11  | 7,49  | 7,89  | 7,89  |
| 0,05  | 0,76  | 6,59  | 9,29  | 9,52  |
| 0,15  | 0,32  | 6,85  | 9,04  | 9,58  |
| 0,34  | 1,87  | 7,02  | 7,36  | 7,49  |
| 4,08  | 6,63  | 7,99  | 8,20  | 8,59  |
| 0,52  | 4,34  | 8,43  | 9,16  | 9,55  |
| 3,66  | 8,65  | 8,76  | 9,83  | 10,09 |
| 0,11  | 0,11  | 6,11  | 8,43  | 8,40  |
| 0,00  | 0,14  | 1,52  | 1,98  | 4,23  |
| 2,82  | 10,89 | 12,65 | 12,06 | 12,02 |
| 0,26  | 0,96  | 7,96  | 9,18  | 9,45  |
| 0,00  | 0,12  | 3,52  | 4,75  | 5,07  |
| 0,06  | 0,34  | 5,07  | 8,46  | 9,53  |
| 0,59  | 7,60  | 11,00 | 11,75 | 11,94 |
| 0,05  | 4,87  | 11,43 | 12,98 | 12,49 |
| 4,25  | 4,74  | 9,95  | 9,61  | 9,69  |
| 0,01  | 1,38  | 7,52  | 8,16  | 8,41  |
| 0,12  | 5,38  | 8,67  | 11,39 | 11,73 |
| 0,19  | 0,58  | 5,72  | 7,56  | 7,73  |
| 0,24  | 0,11  | 6,91  | 9,26  | 8,75  |
| 1,18  | 5,33  | 7,23  | 7,81  | 8,63  |
| -0,03 | 0,59  | 5,87  | 7,44  | 7,73  |
| 1,30  | 7,46  | 8,18  | 8,86  | 9,08  |
| 0,23  | 0,24  | 7,16  | 12,15 | 13,16 |
