# Supplementary material for: Docosahexaenoic acid, but not eicosapentaenoic acid, improves septic shock-induced arterial dysfunction in rats
Source: PubMed Central journal article supplement (PMC5738044; doi:10.1371/journal.pone.0189658), 2017-12-20
Supplement: pone.0189658.s005.pdf [file pone.0189658.s005.pdf]

Table S5

## Mesenteric resistance arteries: relaxation to Ach without inhibitor

|                      | RAT | Ach 10 <sup>-10</sup> | Ach 3.10 <sup>-10</sup> | Ach 10 <sup>-9</sup> | Ach 3.10 <sup>-9</sup> | Ach 10 <sup>-8</sup> |
|----------------------|-----|-----------------------|-------------------------|----------------------|------------------------|----------------------|
| <b>RAT SHAM G5</b>   | R1  | 100,00%               | 98,68%                  | 96,14%               | 75,46%                 | 1,31%                |
|                      | R2  | 100,00%               | 71,52%                  | 40,04%               | 23,43%                 | 5,26%                |
|                      | R3  | 100,00%               | 69,31%                  | 31,65%               | 15,76%                 | 8,18%                |
|                      | R4  | 100,00%               | 88,64%                  | 53,41%               | 32,95%                 | 44,43%               |
|                      | R5  | 100,00%               | 98,87%                  | 96,09%               | 91,17%                 | 20,37%               |
|                      | R6  | 100,00%               | 81,88%                  | 74,08%               | 64,51%                 | 55,87%               |
| <b>RAT SEPSIS G5</b> | R1  | 100,00%               | 100,98%                 | 94,51%               | 89,74%                 | 82,75%               |
|                      | R2  | 100,00%               | 85,19%                  | 81,85%               | 73,59%                 | 63,73%               |
|                      | R3  | 100,00%               | 99,32%                  | 80,77%               | 74,63%                 | 54,30%               |
|                      | R4  | 100,00%               | 96,87%                  | 95,78%               | 91,69%                 | 55,93%               |
|                      | R5  | 100,00%               | 75,54%                  | 67,03%               | 59,96%                 | 51,99%               |
|                      | R6  | 100,00%               | 106,62%                 | 108,35%              | 108,04%                | 101,42%              |
|                      | R7  | 100,00%               | 101,54%                 | 100,81%              | 91,26%                 | 75,48%               |
|                      | R8  | 100,00%               | 94,41%                  | 88,83%               | 85,60%                 | 77,01%               |
|                      | R9  | 100,00%               | 84,13%                  | 67,04%               | 68,83%                 | 62,16%               |
|                      | R10 | 100,00%               | 83,93%                  | 79,14%               | 69,94%                 | 69,94%               |
| <b>RAT SEPSIS EP</b> | R1  | 100,00%               | 96,58%                  | 89,34%               | 57,04%                 | 40,04%               |
|                      | R2  | 100,00%               | 90,49%                  | 81,64%               | 78,36%                 | 49,74%               |
|                      | R3  | 100,00%               | 99,44%                  | 101,16%              | 106,93%                | 96,35%               |
|                      | R4  | 100,00%               | 57,40%                  | 34,74%               | 33,38%                 | 49,31%               |
|                      | R5  | 100,00%               | 111,62%                 | 100,62%              | 86,10%                 | 41,29%               |
|                      | R6  | 100,00%               | 81,67%                  | 75,26%               | 70,65%                 | 67,49%               |
|                      | R7  | 100,00%               | 67,86%                  | 43,86%               | 40,19%                 | 41,14%               |
|                      | R8  | 100,00%               | 95,17%                  | 100,00%              | 100,71%                | 60,36%               |
| <b>RAT SEPSIS DI</b> | R1  | 100,00%               | 100,38%                 | 95,27%               | 82,19%                 | 72,05%               |
|                      | R2  | 100,00%               | 90,53%                  | 81,58%               | 66,39%                 | 53,64%               |
|                      | R3  | 100,00%               | 70,77%                  | 55,58%               | 51,31%                 | 50,41%               |
|                      | R4  | 100,00%               | 90,42%                  | 69,95%               | 34,88%                 | 6,23%                |
|                      | R5  | 100,00%               | 81,54%                  | 73,84%               | 59,81%                 | 28,27%               |
|                      | R6  | 100,00%               | 91,55%                  | 88,08%               | 84,13%                 | 22,73%               |
|                      | R7  | 100,00%               | 90,86%                  | 80,99%               | 80,27%                 | 74,33%               |
|                      | R8  | 100,00%               | 97,89%                  | 95,96%               | 95,82%                 | 93,89%               |
|                      | R9  | 100,00%               | 89,52%                  | 78,91%               | 73,76%                 | 67,57%               |
| <b>RAT SEPSIS OI</b> | R1  | 100,00%               | 89,41%                  | 82,49%               | 75,87%                 | 39,79%               |
|                      | R2  | 100,00%               | 84,38%                  | 93,68%               | 76,53%                 | 64,07%               |
|                      | R3  | 100,00%               | 62,97%                  | 40,02%               | 25,65%                 | 17,38%               |
|                      | R4  | 100,00%               | 69,86%                  | 58,70%               | 26,47%                 | 8,12%                |
|                      | R5  | 100,00%               | 84,54%                  | 69,74%               | 50,00%                 | 32,57%               |
|                      | R6  | 100,00%               | 100,00%                 | 74,62%               | 98,07%                 | 47,06%               |
|                      | R7  | 100,00%               | 93,97%                  | 92,72%               | 63,20%                 | 47,25%               |
|                      | R8  | 100,00%               | 85,44%                  | 84,55%               | 74,71%                 | 64,35%               |

| Ach 3.10 <sup>-8</sup> | Ach 10 <sup>-7</sup> | Ach 3.10 <sup>-7</sup> | Ach 10 <sup>-6</sup> | Ach 3.10 <sup>-6</sup> | Ach 10 <sup>-5</sup> | Ach 3.10 <sup>-5</sup> |
|------------------------|----------------------|------------------------|----------------------|------------------------|----------------------|------------------------|
| 1,27%                  | 4,69%                | 5,91%                  | 0,11%                | 0,11%                  | 0,00%                | 0,11%                  |
| 4,91%                  | 1,93%                | 0,83%                  | -1,03%               | -1,03%                 | -0,83%               | -1,03%                 |
| 9,82%                  | 8,39%                | 2,45%                  | 0,20%                | 0,20%                  | 1,64%                | 0,00%                  |
| 26,14%                 | 21,25%               | 21,25%                 | 5,80%                | 5,80%                  | 3,86%                | 2,27%                  |
| 1,93%                  | 1,18%                | 0,96%                  | 0,29%                | 0,00%                  | 0,00%                | 0,13%                  |
| 18,04%                 | 12,77%               | 22,19%                 | 0,32%                | 0,32%                  | 0,00%                | 0,19%                  |
| 66,73%                 | 54,84%               | 38,30%                 | 33,27%               | 15,49%                 | 14,33%               | 14,64%                 |
| 49,02%                 | 40,00%               | 23,52%                 | 22,68%               | 7,94%                  | 7,34%                | 2,02%                  |
| 44,90%                 | 43,37%               | 27,46%                 | 21,20%               | 10,75%                 | 10,34%               | 0,00%                  |
| 40,05%                 | 35,97%               | -0,75%                 | 0,00%                | -0,54%                 | 0,00%                | -0,75%                 |
| 39,58%                 | 41,12%               | 26,64%                 | 23,56%               | 11,23%                 | 9,69%                | -0,18%                 |
| 98,89%                 | 58,50%               | 35,06%                 | 24,18%               | 12,62%                 | 11,56%               | -0,49%                 |
| 5,58%                  | 1,17%                | 1,32%                  | 0,95%                | 0,81%                  | 0,81%                | 0,37%                  |
| 64,18%                 | 57,88%               | 45,70%                 | 33,85%               | 15,33%                 | 14,13%               | 2,79%                  |
| 13,24%                 | 1,97%                | 6,85%                  | 5,27%                | 0,00%                  | 1,28%                | 1,22%                  |
| 65,77%                 | 72,88%               | 68,22%                 | 64,66%               | 25,24%                 | 23,15%               | 2,21%                  |
| 34,21%                 | 11,86%               | -0,39%                 | -1,45%               | 0,00%                  | -1,45%               | -2,11%                 |
| 2,34%                  | 2,43%                | 0,00%                  | 2,21%                | 0,00%                  | 0,26%                | 0,00%                  |
| 12,90%                 | 3,21%                | 0,55%                  | 0,65%                | 3,16%                  | -0,13%               | -0,64%                 |
| 24,65%                 | 5,74%                | 10,79%                 | 0,00%                | 6,16%                  | 5,74%                | 7,25%                  |
| 40,66%                 | 2,70%                | 2,47%                  | 3,94%                | 0,00%                  | 6,02%                | 1,24%                  |
| 44,32%                 | 31,61%               | 5,13%                  | 5,30%                | 1,31%                  | 2,31%                | 1,81%                  |
| 44,45%                 | 9,93%                | -1,39%                 | 0,00%                | -2,50%                 | -2,50%               | -0,97%                 |
| 51,60%                 | -1,15%               | -0,44%                 | 0,00%                | 0,53%                  | -1,33%               | 0,00%                  |
| 14,27%                 | 4,88%                | 1,58%                  | 1,20%                | -0,38%                 | -0,15%               | -0,60%                 |
| 15,04%                 | 6,76%                | 0,42%                  | -0,26%               | 0,05%                  | -0,83%               | -0,16%                 |
| 41,22%                 | 6,90%                | 0,00%                  | -1,97%               | -1,72%                 | -1,97%               | -1,97%                 |
| 0,19%                  | 0,47%                | 3,53%                  | 0,19%                | -0,56%                 | 1,40%                | 1,21%                  |
| 30,49%                 | 8,23%                | 2,95%                  | 1,05%                | 0,74%                  | 0,74%                | 0,74%                  |
| 9,98%                  | 2,36%                | 1,32%                  | 1,80%                | 1,11%                  | 1,66%                | 1,32%                  |
| 20,77%                 | 3,72%                | 1,05%                  | -0,20%               | 0,72%                  | 0,20%                | 0,52%                  |
| 91,92%                 | 63,91%               | 7,71%                  | 1,46%                | 0,99%                  | 0,61%                | 0,85%                  |
| 59,41%                 | 6,87%                | 0,37%                  | 1,29%                | 1,29%                  | 1,47%                | 2,27%                  |
| 13,44%                 | 7,85%                | 11,12%                 | 3,48%                | 1,19%                  | 16,19%               | 1,04%                  |
| 33,98%                 | 7,03%                | 1,88%                  | 0,91%                | 0,91%                  | 0,00%                | 0,12%                  |
| 5,90%                  | 0,98%                | 1,06%                  | 0,00%                | -0,19%                 | 0,00%                | -0,48%                 |
| 6,94%                  | 2,29%                | 2,03%                  | -1,59%               | -2,39%                 | -2,89%               | -2,39%                 |
| 14,12%                 | 5,10%                | 1,96%                  | 0,00%                | -0,66%                 | -0,41%               | -0,66%                 |
| 1,20%                  | 1,20%                | 1,77%                  | 0,00%                | -1,04%                 | -1,04%               | -1,04%                 |
| 13,80%                 | 1,85%                | 1,62%                  | 0,60%                | 0,48%                  | -0,18%               | 0,48%                  |
| 24,29%                 | 2,20%                | 0,50%                  | 0,50%                | 0,40%                  | 0,65%                | 1,04%                  |

**Ach 10<sup>-4</sup>**

0,55%  
-1,65%  
0,00%  
0,00%  
0,94%  
14,05%  
1,01%  
0,00%  
-1,77%  
-0,45%  
-0,68%  
0,37%  
2,79%  
1,03%  
2,45%  
-0,39%  
-1,69%  
0,00%  
4,83%  
3,94%  
3,42%  
-0,97%  
-0,18%  
-0,60%  
-1,35%  
-1,97%  
-3,44%  
0,74%  
1,11%  
0,33%  
0,52%  
1,29%  
1,19%  
0,12%  
-0,19%  
-3,88%  
0,16%  
-0,88%  
0,00%  
1,04%
