# Supplementary material for: Docosahexaenoic acid, but not eicosapentaenoic acid, improves septic shock-induced arterial dysfunction in rats
Source: PubMed Central journal article supplement (PMC5738044; doi:10.1371/journal.pone.0189658), 2017-12-20
Supplement: pone.0189658.s006.pdf [file pone.0189658.s006.pdf]

Table S6

WB

| MRA iNOS | SHAM-D5 | CLP-D5 | CLP-EPA | CLP-DHA | ΔLP-EPA/DHA |
|----------|---------|--------|---------|---------|-------------|
|          | 0,056   | 0,309  | 0,186   | 0,176   | 0,151       |
|          | 0,131   | 0,294  | 0,189   | 0,181   | 0,111       |
|          | 0,097   | 0,274  | 0,271   | 0,071   | 0,037       |
|          |         | 0,168  | 0,219   | 0,051   | 0,141       |
|          |         |        |         | 0,19    | 0,195       |
|          |         |        |         | 0,165   | 0,098       |
| MRA pi3K | SHAM-D5 | CLP-D5 | CLP-EPA | CLP-DHA | ΔLP-EPA/DHA |
|          | 0,086   | 0,119  | 0,078   | 0,081   | 0,081       |
|          | 0,031   | 0,137  | 0,102   | 0,123   | 0,075       |
|          | 0,065   | 0,147  | 0,155   | 0,125   | 0,079       |
|          | 0,042   | 0,179  | 0,129   | 0,038   | 0,089       |
|          | 0,087   |        | 0,154   | 0,045   | 0,077       |
|          | 0,152   |        | 0,141   |         | 0,059       |
| MRA NfκB | SHAM-D5 | CLP-D5 | CLP-EPA | CLP-DHA | ΔLP-EPA/DHA |
|          | 0,172   | 0,464  | 0,31    | 0,311   | 0,171       |
|          | 0,324   | 0,776  | 0,469   | 0,253   | 0,333       |
|          | 0,313   | 0,522  | 0,427   | 0,282   | 0,332       |
|          | 0,217   |        | 0,324   | 0,373   | 0,182       |
|          | 0,224   |        | 0,39    |         | 0,252       |
|          | 0,136   |        |         |         |             |
| MRA COX2 | SHAM-D5 | CLP-D5 | CLP-EPA | CLP-DHA | ΔLP-EPA/DHA |
|          | 0,053   | 0,411  | 0,384   | 0,247   | 0,182       |
|          | 0,249   | 0,322  | 0,691   | 0,189   | 0,146       |
|          | 0,121   | 0,311  | 0,337   | 0,212   | 0,151       |
|          | 0,161   | 0,336  | 0,433   | 0,241   | 0,097       |
|          |         |        |         |         | 0,223       |
| MRA HO1  | SHAM-D5 | CLP-D5 | CLP-EPA | CLP-DHA | ΔLP-EPA/DHA |
|          | 0,158   | 0,115  | 0,234   | 0,268   | 0,368       |
|          | 0,124   | 0,196  | 0,178   | 0,398   | 0,551       |
|          | 0,123   | 0,102  | 0,16    | 0,397   | 0,4         |
|          | 0,165   | 0,157  | 0,259   | 0,447   | 0,345       |

0,489

0,252

0,184

0,328

0,346
