# Supplementary material for: Docosahexaenoic acid, but not eicosapentaenoic acid, improves septic shock-induced arterial dysfunction in rats
Source: PubMed Central journal article supplement (PMC5738044; doi:10.1371/journal.pone.0189658), 2017-12-20
Supplement: pone.0189658.s007.pdf [file pone.0189658.s007.pdf]

Table s7

EPR

| NO aorta | SHAM-D5 | CLP-D5 | CLP-EPA | CLP-DHA | CLP-EPA/DHA |
|----------|---------|--------|---------|---------|-------------|
|          | 271,7   | 435,52 | 483,75  | 409     | 331,08      |
|          | 234,29  | 500,86 | 516,39  | 347,06  | 418,46      |
|          | 232,7   | 464,05 | 427,59  | 411,25  | 399,5       |
|          | 258,85  | 412,75 | 452,5   | 417,83  | 409,43      |
|          | 389,15  | 511,7  | 711,67  | 417,69  | 373,95      |
|          | 378,84  | 505,1  | 619,56  | 440,34  | 316,74      |
|          | 385,13  | 402,6  | 520,7   |         | 326,59      |
|          | 235,76  | 567,62 | 566,15  |         | 352,08      |
|          | 318,29  | 691,67 |         |         |             |

| 02 aorta | SHAM-D5 | CLP-D5  | CLP-EPA | CLP-DHA | CLP-EPA/DHA |
|----------|---------|---------|---------|---------|-------------|
|          | 781,01  | 2161,05 | 2344,58 | 1032,92 | 704,26      |
|          | 677,06  | 1726,76 | 1211,27 | 1425,14 | 706,56      |
|          | 720,94  | 1924,35 | 1629,84 | 1020,23 | 1033,11     |
|          | 523,33  | 1798,28 | 2406,52 | 946,17  | 1226,84     |
|          | 650,06  | 2124,69 | 2285,24 | 1136,07 | 1350,12     |
|          | 840,65  | 1323,58 | 1815,65 | 1691,19 | 1441        |
|          | 741,48  | 1610,74 | 1805,21 | 1382,63 | 1125,35     |
|          | 991,32  | 1485,5  | 1847,19 | 887,73  | 1314,33     |
|          | 940,19  | 1357,26 | 2626,79 | 1358,89 | 1452,89     |
|          | 971,55  |         |         | 1434    | 1102,42     |
|          |         |         |         | 1218,65 |             |
|          |         |         |         | 1033,09 |             |
