# Supplementary material for: Docosahexaenoic acid, but not eicosapentaenoic acid, improves septic shock-induced arterial dysfunction in rats
Source: PubMed Central journal article supplement (PMC5738044; doi:10.1371/journal.pone.0189658), 2017-12-20
Supplement: pone.0189658.s008.pdf [file pone.0189658.s008.pdf]

Table S8

| TXB2 | SHAM-D5 | CLP-D5 | CLP-EPA | CLP-DHA | CLP-EPA/DHA |
|------|---------|--------|---------|---------|-------------|
|      | 1,58    | 1,65   | 1,08    | 1,88    | 0,94        |
|      | 1,15    | 1,82   | 0,89    | 1,25    | 1,99        |
|      | 1,71    | 3,9    | 1,44    | 2,76    | 1,84        |
|      | 1,62    | 2,21   | 1,34    | 1,34    | 2,24        |

| keto | SHAM-D5 | CLP-D5 | CLP-EPA | CLP-DHA | CLP-EPA/DHA |
|------|---------|--------|---------|---------|-------------|
|      | 0,2     | 0,83   | 0,47    | 0,69    | 0,53        |
|      | 0,26    | 0,91   | 0,73    | 0,4     | 0,5         |
|      | 0,24    | 0,46   | 1,69    | 0,64    | 0,39        |
|      | 0,27    | 1,85   | 1,56    | 0,46    | 0,39        |
|      |         | 0,39   | 2,78    | 0,33    |             |
